# Supplementary material
Source: Springer Nature journal article supplement (https://www.springermedizin.de/resource/supplementary/12947_2010_337_MOESM3_ESM.pdf/9556744)

**LA volume  
(ml)**

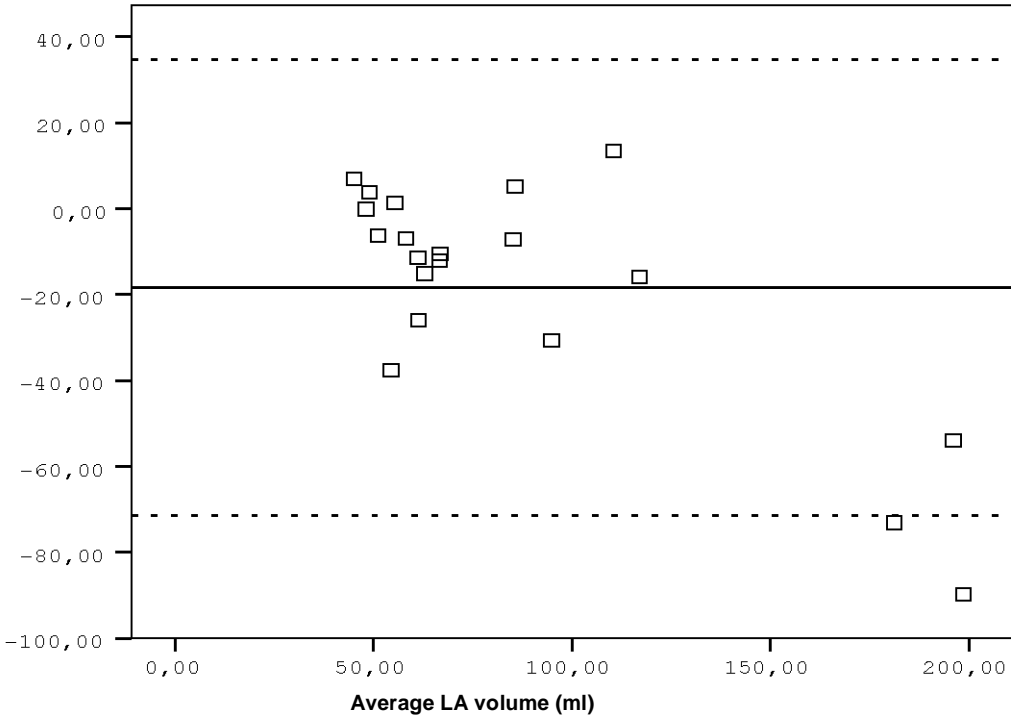

**LVEF**

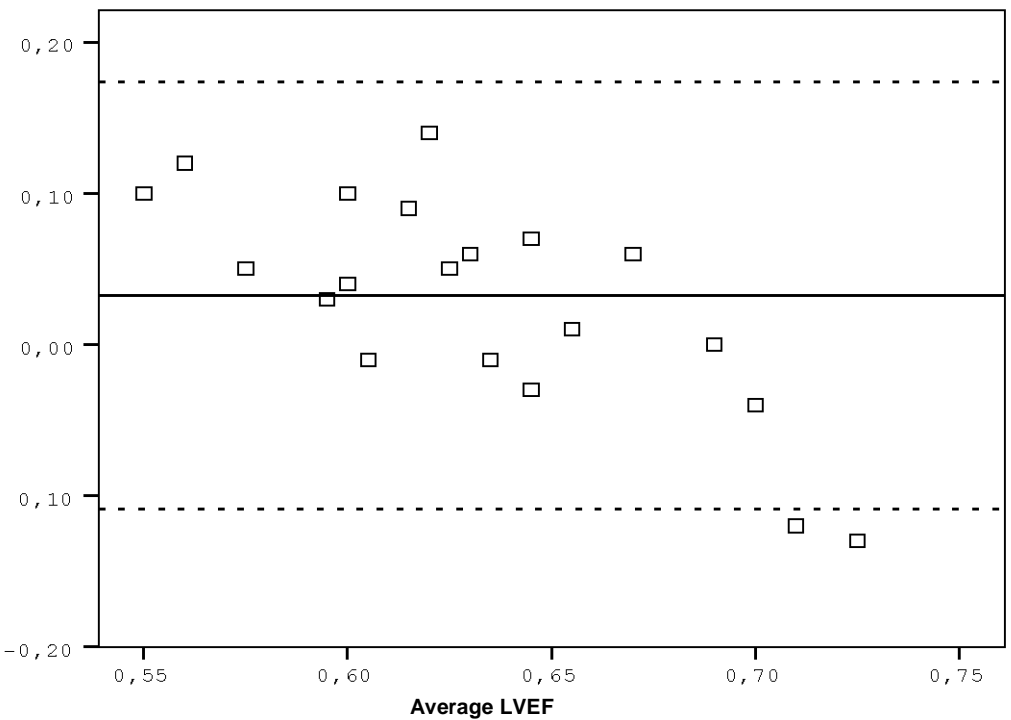

Supplement: MOESM3 [file 9556744]
